# Supplementary material
Source: MDPI journal article supplement (https://www.mdpi.com/2071-1050/15/18/13827)
Supplement: s1 [file s1]

Archive with 5 entries (5 files):
- Figure S1.jpeg
- Figure S2.jpg
- Figure S3.jpg
- File S1-The model description.pdf
- Model S1-Model.zip
